# Supplementary material
Source: publisher figshare collection journal article supplement (https://frontiersin.figshare.com/ndownloader/files/13169966)
Supplement: Supplementary file [file 13169966]

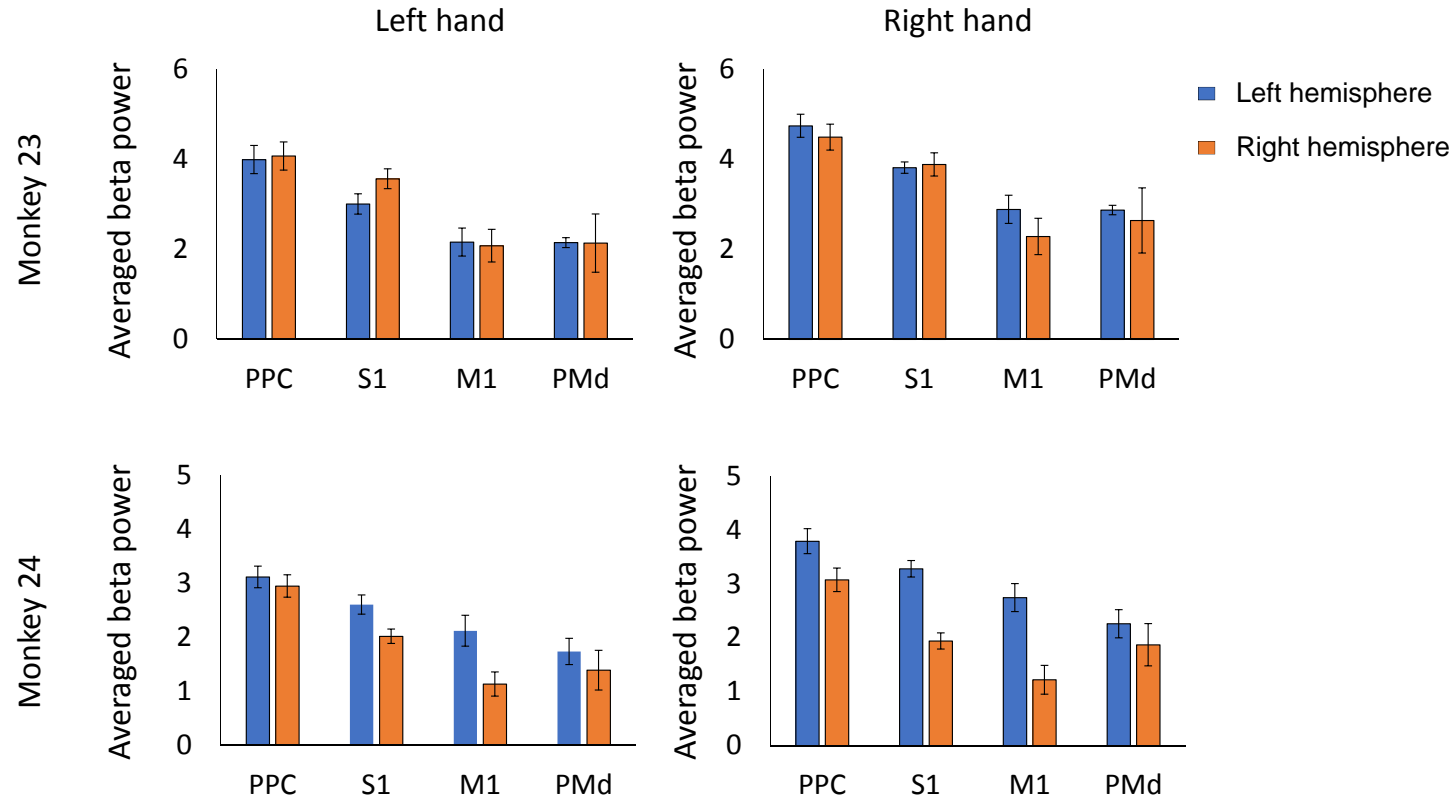

**Supplementary Figure 2.** Distribution of the averaged low beta power across area. For the comparison with the right lateralized pattern of wPLI coherence, the low beta band activity over channels within each cortical region were averaged where the averaging window was defined as 0–0.2 s and 10–20Hz. Error bars represent SEM.
